# Supplementary material
Source: publisher figshare collection journal article supplement (https://tandf.figshare.com/articles/dataset/_/7872242)
Supplement: Supplementary file 1 [file 1]

Supplementary Table S1. Right heart catheterization during exercise in patients with COPD.

| 1. Hemodynamic studies in patients at rest and under stress |                          |                                        |          |                       |                                |               |                                       |                     |
|-------------------------------------------------------------|--------------------------|----------------------------------------|----------|-----------------------|--------------------------------|---------------|---------------------------------------|---------------------|
| Disease                                                     | Total number of patients | Patients undergoing stress examination | Controls | Type of investigation | Body position                  | Rotation      | Start Wattage                         | Time of measurement |
| COPD                                                        | 50                       | 38                                     | -        | Bicycle               | Supine                         | Not specified | Not specified                         | Not specified       |
| COPD                                                        | 85                       | 85                                     | -        | Bicycle               | Supine                         | Not specified | 33 watts                              | Not specified       |
| COPD                                                        | 131                      | 131                                    | -        | Bicycle               | Supine                         | Not specified | 40 watts                              | Not specified       |
| COPD                                                        | 151                      | 151                                    | -        | Bicycle               | Supine                         | Not specified | 40 watts                              | Not specified       |
| COPD + silicosis (n = 286)                                  | 424                      | 424                                    | 286      | Bicycle               | Sedentary                      | Not specified | At 1.05 L/min VO <sub>2</sub>         | Not specified       |
| COPD                                                        | 203                      | 203                                    | -        | Bicycle               | Supine                         | Not specified | 25 watts                              | After 3 min         |
| COPD                                                        | 98                       | 98                                     | -        | Bicycle               | Supine                         | 60 rpm        | 0 watts (4 min) then 20 watts (4 min) | After 3 min         |
| COPD                                                        | 139                      | 85                                     | -        | Bicycle               | Semi-recumbent position        | Not specified | 60% of maximum capacity               | Not specified       |
| COPD                                                        | 31                       | 31                                     | -        | Bicycle               | Supine                         | Not specified | 60% of maximum capacity               | After 6 min         |
| COPD                                                        | 26                       | 26                                     | -        | Bicycle               | Sedentary                      | Not specified | 50% of maximum capacity               | After 3 min         |
| COPD                                                        | 17                       | 17                                     | -        | Bicycle               | Sedentary                      | Not specified | 25 watts                              | After 4 min         |
| COPD                                                        | 10                       | 10                                     | -        | Bicycle               | Semi-recumbent position        | Not specified | 5 watts                               | After 45 sec        |
| COPD                                                        | 12                       | 12                                     | -        | Bicycle               | Sedentary                      | Not specified | 50–60% of peak VO <sub>2</sub>        | After 5 min         |
| COPD                                                        | 21                       | 15                                     | -        | Bicycle               | Supine                         | Not specified | 30 watts                              | Not specified       |
| COPD + ILD (n = 11)                                         | 17                       | 17                                     | 11       | Bicycle               | Supine                         | Not specified | Not specified                         | After 2 min         |
| COPD                                                        | 22                       | 22                                     | -        | Bicycle               | Supine                         | Not specified | 25 watts or 85% predicted bpm         | Not specified       |
| COPD                                                        | 75                       | 43                                     | -        | Bicycle               | Supine                         | Not specified | 25 watts                              | After 3 min         |
| COPD                                                        | 13                       | 13                                     | -        | Bicycle               | Supine                         | Not specified | 85% of predicted bpm                  | After 10 min        |
| COPD                                                        | 39                       | 39                                     | 13       | Bicycle               | Supine                         | Not specified | Between 0 and 60 watts                | After 3 min         |
| COPD                                                        | 8                        | 8                                      | -        | Bicycle               | Sedentary                      | Not specified | 16 watts                              | After 2 min         |
| COPD                                                        | 21                       | 21                                     | -        | Bicycle               | Supine                         | Not specified | Personalized                          | After 2 min         |
| COPD                                                        | 30                       | 30                                     | -        | Bicycle               | Semi-recumbent position        | Not specified | Not specified                         | After 2 min         |
| COPD                                                        | 17                       | 17                                     | -        | Bicycle               | Not specified                  | Stable        | Not specified                         | After 3 min         |
| COPD                                                        | 109                      | 109                                    | -        | Bicycle               | Supine                         | Not specified | 30 watts                              | After 5 min         |
| COPD                                                        | 24                       | 9                                      | -        | Bicycle               | Supine                         | Not specified | Not specified                         | Not specified       |
| COPD                                                        | 21                       | 21                                     | -        | Bicycle               | Supine                         | Not specified | 60% of maximum capacity               | After 6 min         |
| COPD                                                        | 100                      | 24                                     | -        | Bicycle               | Semi-recumbent position        | Not specified | 50% of maximum capacity               | Not specified       |
| COPD                                                        | 30                       | 30                                     | -        | Bicycle               | Semi-recumbent position        | Not specified | 25 watts                              | After 1 min         |
| COPD                                                        | 10                       | 10                                     | -        | Bicycle               | Sedentary                      | 50 rpm        | 25 watts                              | After 2 min         |
| COPD                                                        | 16                       | 16                                     | 8        | Bicycle               | Supine                         | Not specified | 40% of maximum capacity               | Not specified       |
| COPD with/without PH                                        | 44                       | 44                                     | -        | Bicycle               | Supine                         | Not specified | 25 watts                              | Not specified       |
| 2. Hemodynamic and cardiopulmonary performance studies      |                          |                                        |          |                       |                                |               |                                       |                     |
| Disease                                                     | Total number of patients | Patients undergoing stress examination | Controls | Type of investigation | Body position                  | Rotation      | Start Wattage                         | Time of measurement |
| COPD                                                        | 43                       | 43                                     | -        | Bicycle               | Supine                         | Not specified | Variable between 20 and 40 watts      | After 5 min         |
| COPD                                                        | 23                       | 23                                     | -        | Bicycle               | Supine                         | Not specified | 10–40 watts                           | Not specified       |
| COPD                                                        | 8                        | 8                                      | -        | Bicycle               | Sedentary                      | Not specified | Different tests                       | Not specified       |
| COPD                                                        | 10                       | 10                                     | -        | Bicycle               | Supine                         | Not specified | 25 watts                              | After 2 min         |
| COPD                                                        | 29                       | 29                                     | -        | Bicycle               | Supine                         | Not specified | 25 watts                              | After 3 min         |
| COPD + coronary disease (n = 37)                            | 8                        | 8                                      | 13       | Bicycle               | Supine                         | Not specified | 25 watts                              | After 3 min         |
| 3. Interventional hemodynamic studies                       |                          |                                        |          |                       |                                |               |                                       |                     |
| Disease                                                     | Total number of patients | Patients undergoing stress examination | Controls | Type of investigation | Body position                  | Rotation      | Start Wattage                         | Time of measurement |
| COPD                                                        | 6                        | 6                                      | -        | Bicycle               | Not specified                  | Not specified | 25 watts                              | After 3 min         |
| COPD                                                        | 20                       | 20                                     | -        | Bicycle               | Supine                         | Not specified | 25 watts                              | After 3–4 min       |
| COPD                                                        | 94                       | 54                                     | -        | Bicycle               | Supine                         | Not specified | 40 watts                              | After 6 min         |
| COPD                                                        | 40                       | 35                                     | -        | Bicycle               | Supine                         | Not specified | 30 watts                              | After 10 min        |
| COPD with PH                                                | 8                        | 8                                      | -        | Bicycle               | Supine                         | Not specified | Not specified                         | Not specified       |
| COPD                                                        | 12                       | 12                                     | -        | Bicycle               | Semi-recumbent position        | Not specified | 30 watts                              | After 3 min         |
| COPD                                                        | 9                        | 9                                      | -        | Bicycle               | Semi-recumbent position        | Not specified | 50% of maximum capacity               | After 3 min         |
| COPD                                                        | 8                        | 8                                      | -        | Bicycle               | Semi-recumbent position        | Not specified | 50–60% of maximum capacity            | After 10 min        |
| COPD                                                        | 20                       | 14                                     | -        | Bicycle               | Supine                         | 50 rpm        | 12.5 watts                            | Not specified       |
| COPD with PH                                                | 15                       | 15                                     | -        | Bicycle               | Supine                         | Not specified | 25 watts                              | After 1 min         |
| COPD with PH                                                | 20                       | 20                                     | -        | Bicycle               | Supine                         | Not specified | 25 watts                              | Not specified       |
| COPD                                                        | 33                       | 33                                     | -        | Bicycle               | Sedentary                      | Not specified | 60% of maximum capacity               | After 4 min         |
| COPD                                                        | 11                       | 11                                     | -        | Bicycle               | Supine                         | Not specified | 25 watts                              | After 3 min         |
| COPD with PH                                                | 10                       | 10                                     | -        | Bicycle               | Supine                         | 60 rpm        | 5–10 watts                            | Not specified       |
| COPD                                                        | 19                       | 8                                      | -        | Bicycle               | Sedentary                      | Not specified | 60% of maximum capacity               | After 4 min         |
| COPD                                                        | 39                       | 39                                     | -        | Bicycle               | Sedentary                      | Not specified | 60% of maximum capacity               | After 4 min         |
| COPD                                                        | 36                       | 36                                     | -        | Bicycle               | Sedentary                      | Not specified | 60% of maximum capacity               | After 4 min         |
| COPD                                                        | 20                       | 20                                     | -        | Bicycle               | Not specified                  | Not specified | 50% of maximal watt count             | Not specified       |
| COPD                                                        | 18                       | 18                                     | -        | Bicycle               | Supine                         | Not specified | 40% of maximum capacity               | Not specified       |
| COPD                                                        | 15                       | 15                                     | -        | Bicycle               | Supine                         | Not specified | 40% of maximum capacity               | Not specified       |
| COPD                                                        | 8                        | 8                                      | -        | Bicycle               | Supine                         | Not specified | 25 watts                              | After 2 min         |
| COPD                                                        | 12                       | 12                                     | -        | Treadmill             | Standing position              | Not specified | 25 watts                              | After 3 min         |
| COPD                                                        | 9                        | 9                                      | -        | Bicycle               | Supine                         | Not specified | 30 watts                              | Not specified       |
| COPD                                                        | 8                        | 7                                      | -        | Bicycle               | Supine                         | Not specified | 25 watts                              | Not specified       |
| COPD with noninvasive ventilation + others (n = 20)         | 13                       | 13                                     | 20       | Bicycle               | Supine                         | Not specified | Variable between 30 and 70 watts      | Not specified       |
| COPD with PH                                                | 7                        | 7                                      | -        | Bicycle               | Supine                         | 60 rpm        | 25 watts                              | After 1 min         |
| 4. Other studies                                            |                          |                                        |          |                       |                                |               |                                       |                     |
| Disease                                                     | Total number of patients | Patients undergoing stress examination | Controls | Type of investigation | Body position                  | Rotation      | Start Wattage                         | Time of measurement |
| COPD                                                        | 47                       | 47                                     | -        | Bicycle               | Supine/Semi-recumbent position | Not specified | Variable                              | After 4 min         |
| COPD                                                        | 23                       | 23                                     | -        | Bicycle               | Supine                         | Not specified | Variable (23–85% VO <sub>2</sub> max) | Not specified       |
| COPD                                                        | 64                       | 64                                     | -        | Bicycle               | Supine                         | Not specified | 33 watts                              | After 6 min         |
| COPD                                                        | 23                       | 23                                     | -        | Bicycle               | Not specified                  | Not specified | Variable between 0 and 40 watts       | Not specified       |
| COPD + others (n = 19)                                      | 32                       | 32                                     | 12       | Bicycle               | Sedentary                      | Not specified | 6.25–25 watts/min                     | After 1 min         |
| COPD + others (n = 96)                                      | 5                        | 5                                      | -        | Bicycle               | Supine                         | Not specified | 10 watts                              | After 3 min         |

| Load increase                               | Additional measurements                | Source                        | Reference number in main bibliography |
|---------------------------------------------|----------------------------------------|-------------------------------|---------------------------------------|
| Not specified                               |                                        | Burrows et al., 1972          | 34                                    |
| Steady state                                |                                        | Weitzenblum et al., 1979      | 35                                    |
| Steady state                                |                                        | Kessler et al., 2001          | 36                                    |
| Steady state                                |                                        | Oswald-Mammosser et al., 1991 | 37                                    |
| Steady state                                | CPET                                   | Evers et al., 1992            | 38                                    |
| Steady state                                | Examination after 6 months             | Timms et al., 1985            | 39                                    |
| 10 watts/2 min until exhaustion             |                                        | Hilde et al., 2013            | 40                                    |
| Steady state                                |                                        | Portillo et al., 2015         | 41                                    |
| Steady state                                | RNV                                    | Seibold et al., 1988          | 47                                    |
| Steady state                                | CPET                                   | Fletcher et al., 1989         | 45                                    |
| 10 watts/5 min until maximum exertion       | CPET                                   | Christensen et al., 2004      | 44                                    |
| 5 watts/min until maximum exertion          | CPET                                   | Miki et al., 2008             | 46                                    |
| Steady state                                | RNV + CPET                             | Mahler et al., 1984           | 58                                    |
| Steady state                                | CPET                                   | Faller et al., 1998           | 73                                    |
| Every 2 min until maximum exertion          |                                        | Yamakami et al., 1997         | 74                                    |
| Steady state                                | Histology                              | Magge et al., 1988            | 68                                    |
| Steady state                                | Oxygen test                            | Fujimoto et al., 2002         | 69                                    |
| Steady state                                | Histology + oxygen test                | Wright et al., 1983           | 70                                    |
| Steady state                                | CPET                                   | Butler et al., 1988           | 49                                    |
| 16 watts/3 min until maximum exertion       |                                        | Albert et al., 1985           | 51                                    |
| Every 3 min until maximum exertion          |                                        | Boerrigter et al., 2012       | 55                                    |
| Every 3 min until maximum exertion          | CPET                                   | Boerrigter et al., 2014       | 25                                    |
| Not specified                               | Oxygen test                            | Horsfield et al., 1968        | 48                                    |
| Steady state                                |                                        | Chabot et al., 2001           | 50                                    |
| Not specified                               | RNV                                    | Burghuber et al., 1988        | 56                                    |
| Steady state                                | RNV + drug testing (molsidomine)       | Seibold et al., 1988          | 57                                    |
| Steady state                                | RNV                                    | Biernacki et al., 1988        | 59                                    |
| 25 watts/2 min until maximum exertion       |                                        | Steiner et al., 1999          | 60                                    |
| 25 watts/3 min until maximum exertion       | CPET + RNV                             | Keller et al., 1995           | 61                                    |
| Steady state                                | MRI                                    | Holverda et al., 2009         | 62                                    |
| 25 watts/2 min until maximum exertion       | RNV                                    | Gassner et al., 1985          | 63                                    |
| Load increase                               | Additional measurements                | Source                        | Reference number in main bibliography |
| Steady state                                | CPET                                   | Schrijen et al., 1984         | 110                                   |
| Steady state                                | CPET                                   | Henriquez et al., 1986        | 66                                    |
| Different tests                             |                                        | Lonsdorfer-Wolf et al., 2004  | 67                                    |
| Steady state                                | CPET + histology                       | Kubo et al., 2000             | 71                                    |
| Steady state                                |                                        | Wright et al., 1992           | 72                                    |
| 25 or 50 watts/6 min until maximum exertion |                                        | Lehmann et al., 1983          | 75                                    |
| Load increase                               | Additional measurements                | Source                        | Reference number in main bibliography |
| Steady state                                | Oxygen test                            | Hamaoka et al., 2008          | 78                                    |
| Steady state                                | Second examination                     | Sclinger et al., 1987         | 79                                    |
| Steady state                                |                                        | Chaouat et al., 1997          | 80                                    |
| Steady state                                |                                        | Levi-Valensi et al., 1992     | 81                                    |
| Until maximum exertion                      | Drug testing (hydralazine)             | Lupi-Herrera et al., 1984     | 82                                    |
| 30 watts/5 min until maximum exertion       | Drug testing (urapidil)                | Adnot et al., 1988            | 83                                    |
| Steady state                                | CPET + drug testing (NO)               | Roger et al., 1997            | 84                                    |
| Steady state                                | Drug testing (CCB) + CPET              | Agusti et al., 1990           | 86                                    |
| 12.5 watts/3 min until maximum exertion     | Drug testing (Oxy vs Feno)             | Saito et al., 1999            | 87                                    |
| 25 watts/2 min                              | Drug testing(CCB) + second examination | Agostoni et al., 1989         | 88                                    |
| 25 watts/3 min until maximum exertion       | Drug testing (CCB)                     | Franz et al., 2002            | 89                                    |
| Steady state                                | Drug testing (CCB)                     | Kanazawa et al., 2004         | 90                                    |
| Steady state                                | Second examination                     | Pison et al., 1991            | 91                                    |
| 5–10 watts/min until maximum exertion       | CPET + drug testing (ACE inhibitor)    | Pailt et al., 1989            | 92                                    |
| Steady state                                |                                        | Kanazawa et al., 2000         | 94                                    |
| Steady state                                |                                        | Kanazawa et al., 2002         | 95                                    |
| Steady state                                | Drug testing (ACE inhibitor)           | Kanazawa et al., 2003         | 93                                    |
| Steady state                                | Drug testing (sildenafil)              | Blanco et al., 2010           | 96                                    |
| Steady state                                | Drug testing (sildenafil) + CPET       | Holverda et al., 2008         | 97                                    |
| Steady state                                | Drug testing (sildenafil) + MRI        | Rietema et al., 2008          | 98                                    |
| Steady state until exhaustion               | Second examination                     | Kubo et al., 1998             | 102                                   |
| Steady state                                |                                        | Mineo et al., 2002            | 103                                   |
| Steady state                                | CPET + second examination              | Oswald-Mammosser et al., 1998 | 105                                   |
| Steady state until exhaustion               | Second examination                     | Haniuda et al., 2000          | 104                                   |
| Steady state                                | Second examination after 12 months     | Schönhofer et al., 2001       | 107                                   |
| 25 watts/4 min until maximum exertion       | CPET + second examination              | Borst et al., 1999            | 108                                   |
| Load increase                               | Additional measurements                | Source                        | Reference number in main bibliography |
| Steady state                                | CPET                                   | Boerrigter et al., 2012       | 112                                   |
| Different tests                             | CPET                                   | Schrijen et al., 1987         | 111                                   |
| Steady state                                | CPET                                   | Kessler et al., 1999          | 31                                    |
| 2 load levels                               |                                        | Schrijen et al., 1990         | 109                                   |
| Level increase until exhaustion             | RNV + CPET                             | Medoff et al., 1998           | 113                                   |
| 10 watts/3 min until exhaustion             |                                        | Keusch et al., 2014           | 129                                   |
